# Supplementary material for: Morphology, Photocatalytic and Antimicrobial Properties of TiO2 Modified with Mono- and Bimetallic Copper, Platinum and Silver Nanoparticles
Source: PubMed Central journal article supplement (PMC6722503; doi:10.3390/nano9081129), 2019-08-06
Supplement: nanomaterials-09-01129-s001.pdf [file nanomaterials-09-01129-s001.pdf]

# Morphology, photocatalytic and antimicrobial properties of TiO<sub>2</sub> modified with mono- and bimetallic copper, platinum and silver nanoparticles

Izabela Wysocka , Ewa Kowalska, Jacek Ryl, Grzegorz Nowaczyk, Anna Zielińska-Jurek

Supplementary data

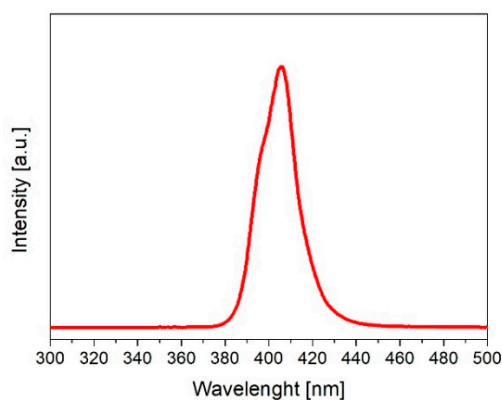

Figure S1. Emission spectrum of a set of LED diodes

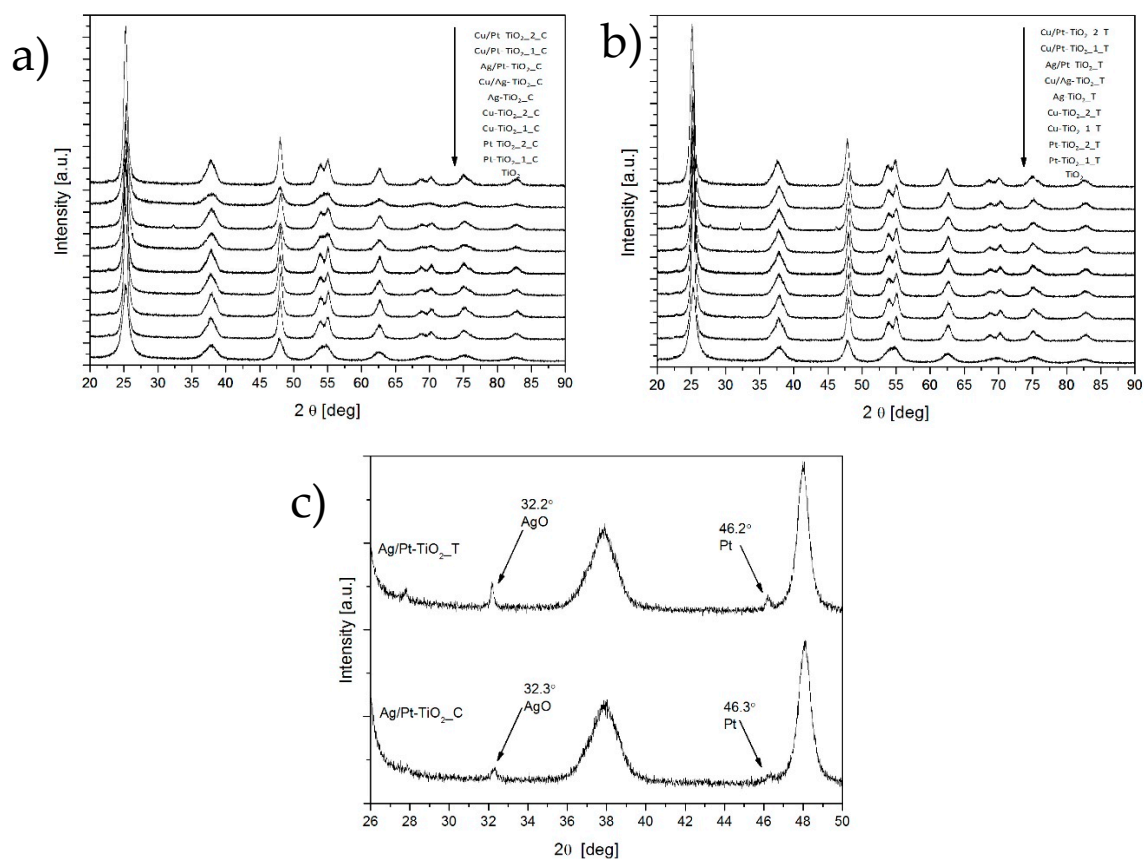

Figure S2. XRD patterns of a) chemically reduced, b) thermally reduced and c) magnification in the 2θ range of 26-50° for Ag/Pt-TiO<sub>2</sub>\_C and Ag/Pt-TiO<sub>2</sub>\_T

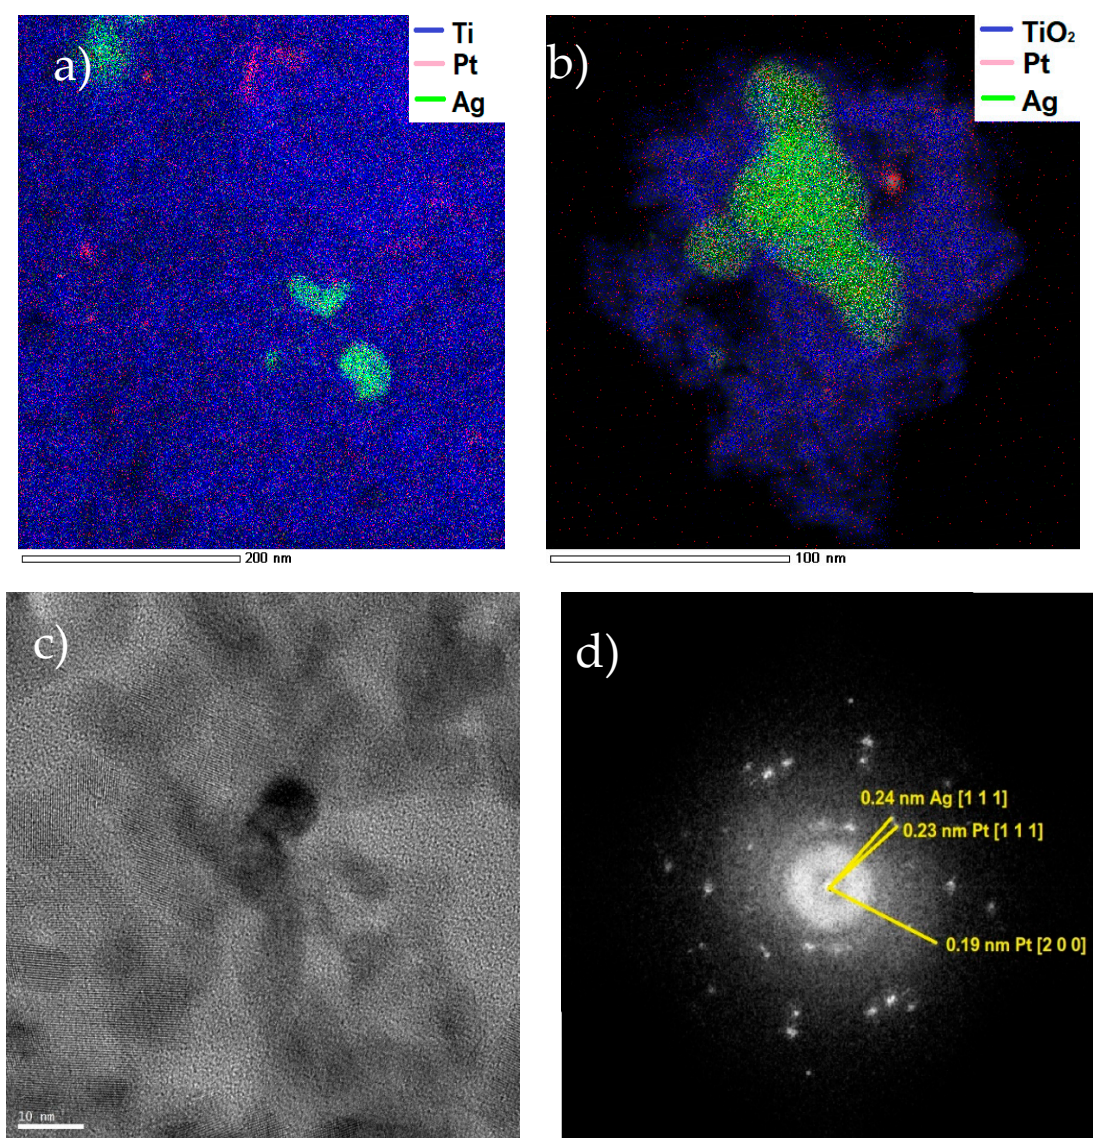

**Figure S3.** A) and b) EDS mapping, c) TEM image and d) FFT analysis for Ag/Pt-TiO<sub>2</sub>\_C

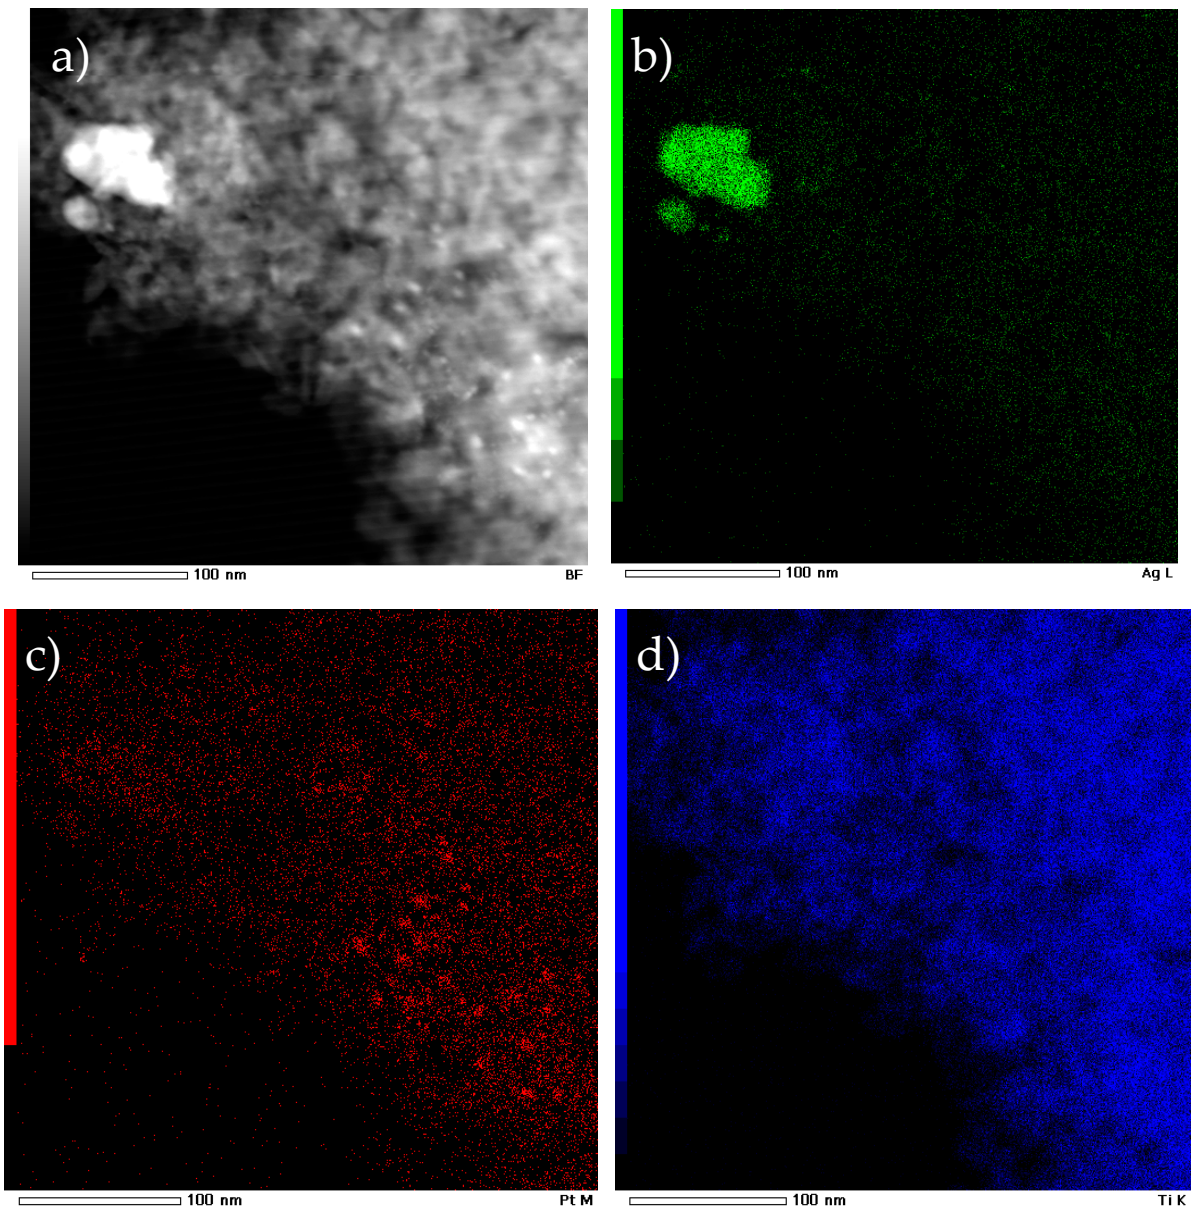

**Figure S4.** A) Dark-field scanning transmission (DF-STEM) microscopy and EDS mapping of b) silver, c) platinum and d) titanium for Ag/Pt-TiO<sub>2</sub>\_T

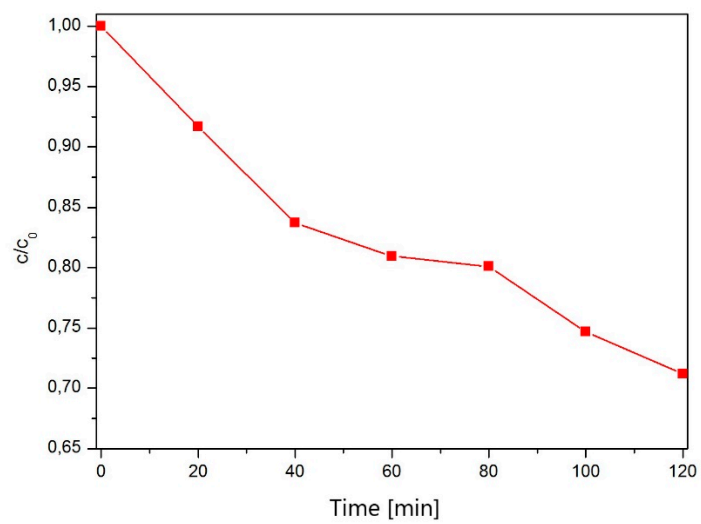

**Figure S5.** Phenol oxidation with Pt-TiO<sub>2</sub>\_1\_T using LED system
